# Supplementary material
Source: PubMed Central journal article supplement (PMC4259178)
Supplement: Supp_Data.pdf [file Supp_Data.pdf]

## Supplementary Data

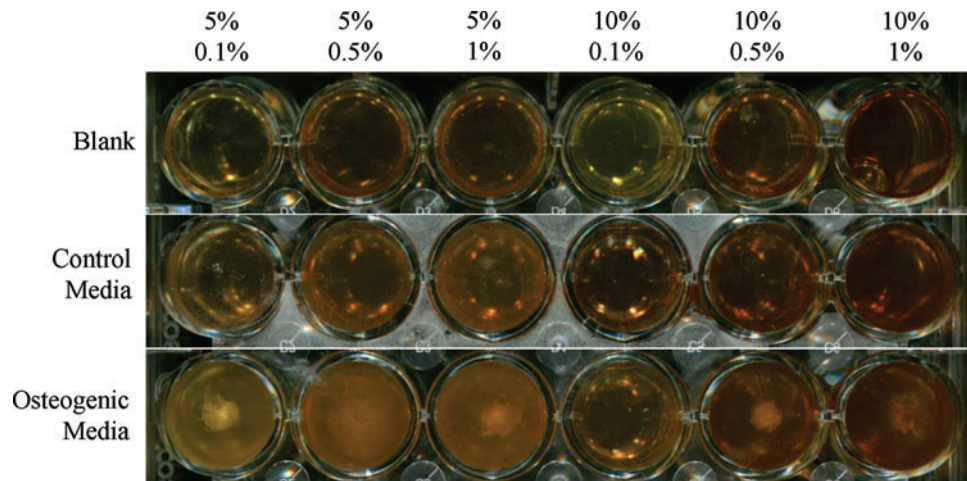

**SUPPLEMENTARY FIG. S1.** Scanned images of blank (no cells), control media, and osteogenic media scaffolds after 3 weeks of culture reveal mineralization in osteogenic conditions but not in blank or control conditions.
